# Supplementary material for: The GTPase Rab37 Participates in the Control of Insulin Exocytosis
Source: PubMed Central journal article supplement (PMC3694898; doi:10.1371/journal.pone.0068255), 2013-06-27

## Supplementary Figure 2

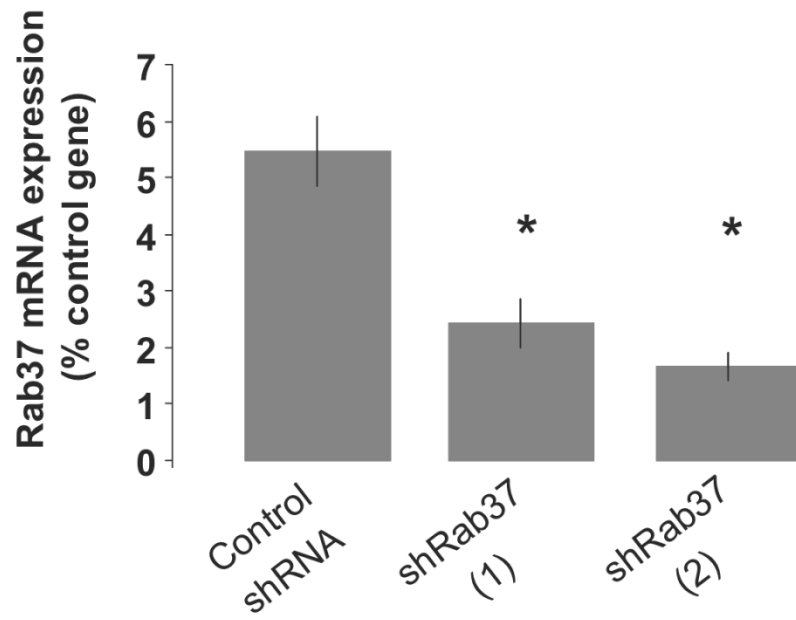

Supplement: pone.0068255.s002.pdf [file pone.0068255.s002.pdf]
