# Supplementary material for: The GTPase Rab37 Participates in the Control of Insulin Exocytosis
Source: PubMed Central journal article supplement (PMC3694898; doi:10.1371/journal.pone.0068255), 2013-06-27
Supplement: pone.0068255.s004.pdf [file pone.0068255.s004.pdf]

## Supplementary Figure 4

|               |             | 66           | 70           |                | GTP-binding<br>site |  |
|---------------|-------------|--------------|--------------|----------------|---------------------|--|
| <b>Rab3a</b>  | <b>KTIY</b> | <b>RNDKR</b> | <b>IKLQI</b> | <b>WDTAGQE</b> | <b>RYR</b>          |  |
| <b>Rab27a</b> | <b>DGAV</b> | <b>GRGQR</b> | <b>IHLQL</b> | <b>WDTAGQE</b> | <b>RFR</b>          |  |
| <b>Rab37</b>  | <b>KVVT</b> | <b>VDGAR</b> | <b>VKLQI</b> | <b>WDTAGQE</b> | <b>RFR</b>          |  |
| <b>Rab1a</b>  | <b>RTIE</b> | <b>LDGKT</b> | <b>IKLQI</b> | <b>WDTAGQE</b> | <b>RFR</b>          |  |
